# Supplementary material for: Forecasted Trends of the New COVID-19 Epidemic Due to the Omicron Variant in Thailand, 2022
Source: MDPI journal article supplement (doi:10.3390/vaccines10071024), 2022-06-26
Supplement: s1 [file s1]

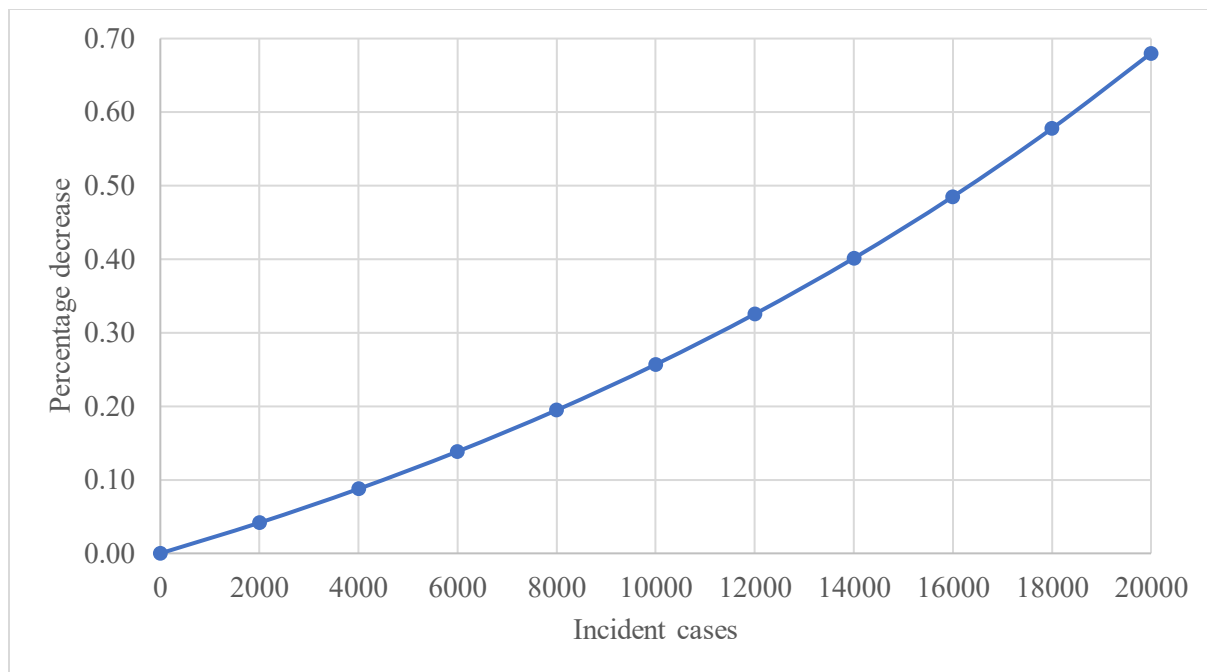

**Figure S1.** Percentage decrease of contact rate in relation to daily incident cases under the Omicron variant epidemic (base case)—reflecting effectiveness of non-pharmaceutical interventions
